# Supplementary material for: Production of natural zeolite-filled recycled PVDF filters and their application for gray water treatment
Source: Royal Society of Chemistry journal article supplement (doi:10.1039/d4ew01070a), 2025-01-01
Supplement: d4ew01070a1.pdf [file d4ew01070a1.pdf]

### Supplementary Material Data

**Table S1.** Physical parameters of natural clinoptilolite.

|                                |                   |      |
|--------------------------------|-------------------|------|
| SiO <sub>2</sub>               | wt.%              | 78.0 |
| Al <sub>2</sub> O <sub>3</sub> | wt.%              | 13.0 |
| CaO                            | wt.%              | 2.10 |
| Na <sub>2</sub> O              | wt.%              | 0.14 |
| K <sub>2</sub> O               | wt.%              | 4.20 |
| MgO                            | wt.%              | 1.13 |
| Fe <sub>2</sub> O <sub>3</sub> | wt.%              | 1.22 |
| Impurities                     | wt.%              | 0.21 |
| Surface area                   | m <sup>2</sup> /g | 25   |

**Table S2.** Experimental optimization parameters.

| <b>Factors</b>                                   | <b>Levels</b> |
|--------------------------------------------------|---------------|
| A-Flow rate (L/min)                              | 0.4, 0.6, 0.8 |
| B-Temperature (°C)                               | 30, 60, 90    |
| C- Filtered substance concentration (MB,) (mg/L) | 5, 10, 15     |
| C- Filtered substance concentration (LAS) (mg/L) | 50, 100, 150  |
| C- Filtered substance concentration (Oil) (%)    | 1, 2, 3       |

**Table S3.** Synthetic gray water contents and concentrations.

| <b>Synthetic Gray Water Contents</b> | <b>Concentrations (mg/L)</b> |
|--------------------------------------|------------------------------|
| MP                                   | 200                          |
| SSM                                  | 100                          |
| LAS                                  | 50                           |
| Glycerol                             | 200                          |
| MB                                   | 20                           |
| Phosphate                            | 20                           |
| Nitrate                              | 20                           |

**Table S4.** Zone diameters formed by filters with gram positive and negative bacteria.

| Membrane      | Zone diameter (mm)       | Zone diameter (mm)     |
|---------------|--------------------------|------------------------|
|               | ( <i>S.Aureus</i> )<br>+ | ( <i>E.Coli</i> )<br>- |
| PVDF          | -                        | 0.5                    |
| PVDF-1wt.%Clp | 2                        | 2                      |
| PVDF-2wt.%Clp | 2                        | 2                      |
| PVDF-3wt.%Clp | 1                        | 2                      |
| PVDF-4wt.%Clp | 1                        | 2                      |

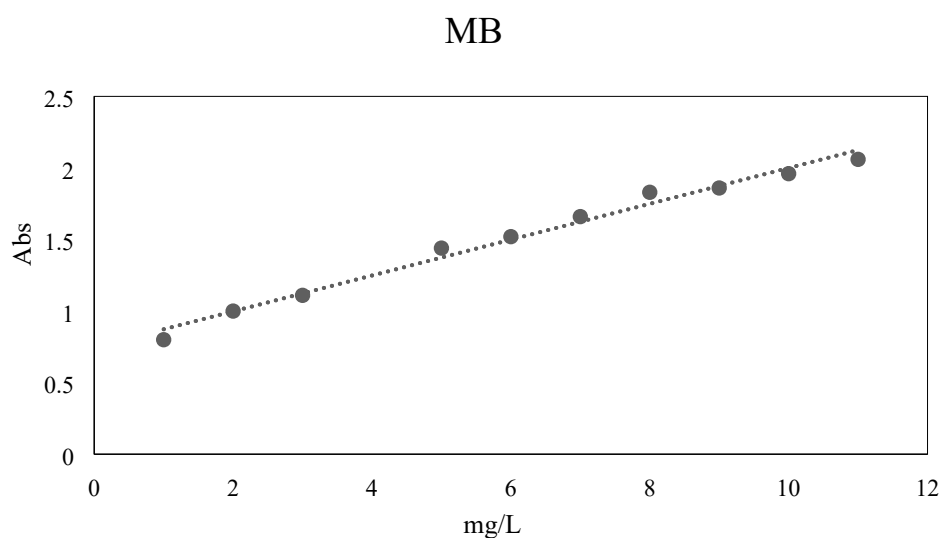

**Figure S1.** Methylene blue (MB) calibration graph.

### LAS Determination

In this analysis, a 50-ml sample was taken into a separatory funnel. 1 drop of phenolphthalein indicator was added to the solution, and 1N sodium hydroxide was added until the medium became basic (pink color appeared). Next, we added 1N sulfuric acid solution until the medium became neutral and the pink color vanished. 5 mL of chloroform and 12.5 mL of methylene blue were added and shaken vigorously for 30 seconds and waited for at least 10 minutes. The resulting lower phase was taken into the second separation funnel. This procedure was repeated twice more. 25 mL of washing solution was added to the solution collected in the second separatory funnel. Shaken vigorously for 30 seconds and waited for at least 10 minutes. The resulting subphase was transferred to a 50-mL flask and completed with chloroform to the marker line. In the UV-Vis spectrophotometer (Shimadzu 1280), concentrations were read directly according to the calibration curves with the help of the UV-Probe program against

chloroform blank solution at 652 nm wavelength. Rejection percentage was calculated from the concentration difference.

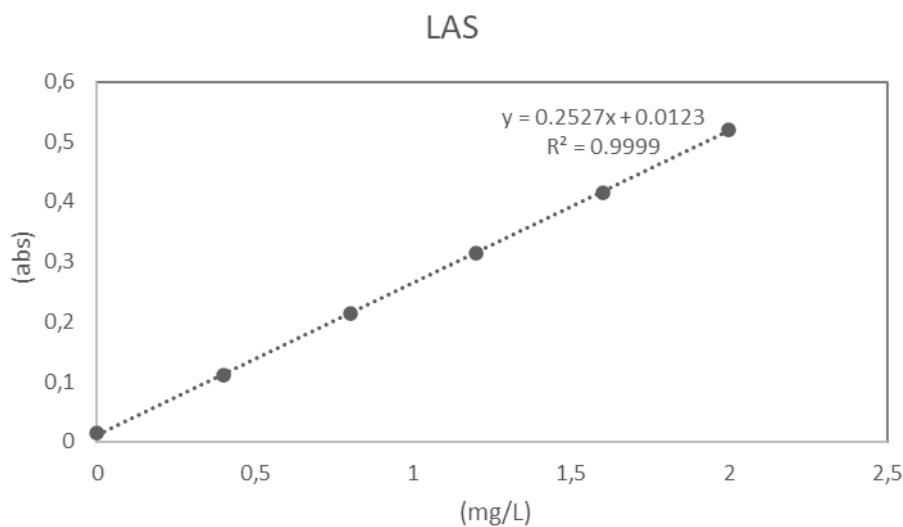

**Figure S2.** Linear alkyl benzene sulfonate (LAS) calibration graph.

### **COD Determination**

To prepare the potassium dichromate-mercury sulfate solution, 33.3 g of mercury sulfate ( $\text{HgSO}_4$ ) was dissolved in 700 mL of distilled water and 167 mL of concentrated  $\text{H}_2\text{SO}_4$  (1.84 g/mL). To the cooled solution was added 10.216 g  $\text{K}_2\text{Cr}_2\text{O}_7$  (dried at 105 °C for two hours). This solution was made up to 1 L with distilled water. To prepare a sulfuric acid-silver sulfate solution, 10.12g silver sulfate ( $\text{Ag}_2\text{SO}_4$ ) was dissolved in 1 L  $\text{H}_2\text{SO}_4$  (1.84 g/mL). The solution was prepared one day before use and stored in a colored bottle. Potassium hydrogen phthalate (KHP) stock COD solution was prepared by dissolving 0.425 g of KHP, brought to constant weight at 120 °C, in distilled water and added to 500 mL. Standard solutions were prepared to correspond to the range of 100-1000 COD. While preparing the sample, 1.5 mL of potassium dichromate-mercury sulfate solution, 3.5 mL of sulfuric acid-silver sulfate solution and 2.5 mL of the solution to be measured COD were added. The prepared solutions were heated in a thermoreactor at 150 °C for two hours.

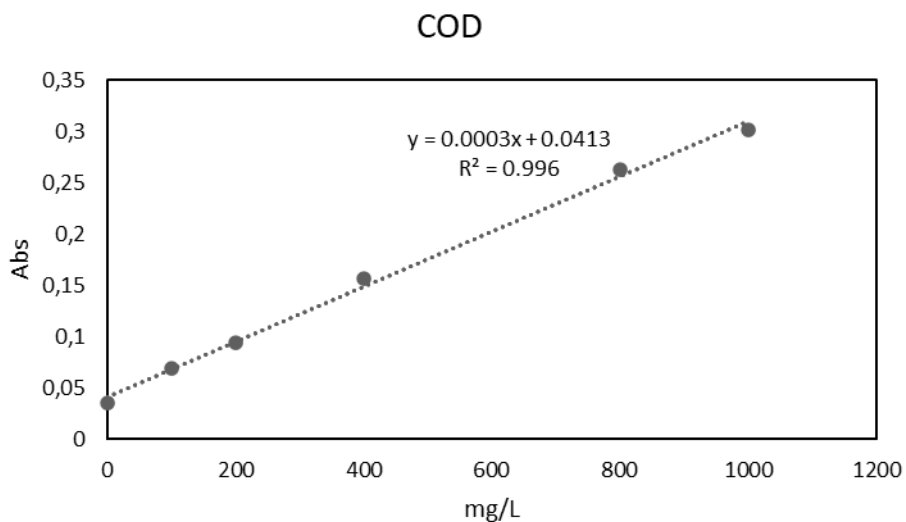

**Figure S3.** Chemical oxygen demand calibration graph.

### **Turbidity Determination**

To prepare Solution I, 1g hydrazine sulfate ((NH<sub>2</sub>)<sub>2</sub>H<sub>2</sub>SO<sub>4</sub>) was dissolved in purified water in a 100 flask. It was completed up to the mark line and shaken well. To prepare solution II, 10g hexamethylene tetra amine ((CH<sub>2</sub>)<sub>6</sub>N<sub>4</sub>) was dissolved in 100 fl. It was completed up to the mark line and shaken well. To prepare the stock solution, 5 mL solution I and 5 mL solution II were mixed well in a 100 flask. It was kept at 25 °C for 24 hours. It was completed with distilled water up to the mark line and mixed thoroughly. For the preparation of the standard solution, 25 mL of the stock solution was taken and diluted to the mark in a 100 parts balanjugate and mixed thoroughly. A calibration graph was generated from the standard solutions.

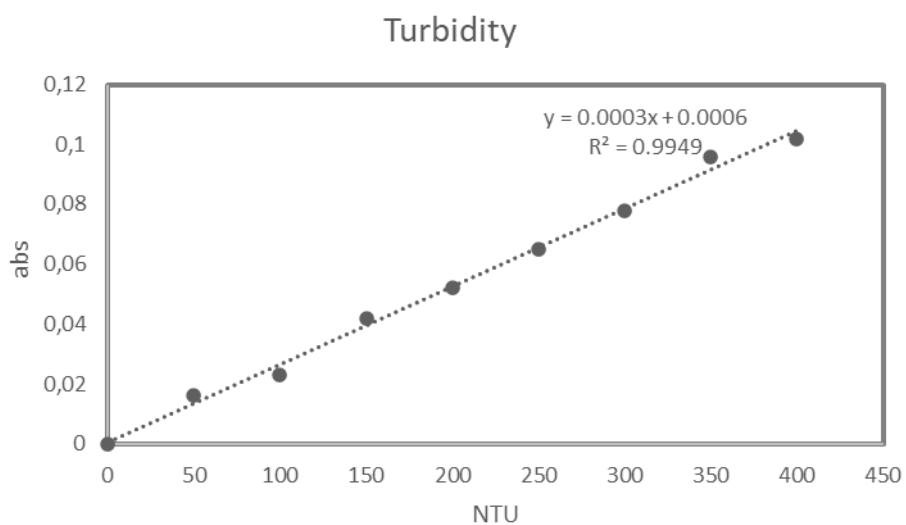

**Figure S4.** Turbidity calibration graph.

**Table S5.** Results of MB rejection.

| <b>Run</b> | <b>A:Flow rate<br/>(L/min)</b> | <b>B:Temperature<br/>(°C)</b> | <b>C: Concentration<br/>(mg/L)</b> | <b>Rejection<br/>(%)</b> |
|------------|--------------------------------|-------------------------------|------------------------------------|--------------------------|
| 1          | 0.6                            | 90                            | 10                                 | 98                       |
| 2          | 0.6                            | 30                            | 10                                 | 99.8                     |
| 3          | 0.4                            | 90                            | 15                                 | 98.3                     |
| 4          | 0.6                            | 60                            | 10                                 | 98.3                     |
| 5          | 0.4                            | 90                            | 5                                  | 98.6                     |
| 6          | 0.6                            | 60                            | 10                                 | 98.4                     |
| 7          | 0.8                            | 90                            | 5                                  | 97.8                     |
| 8          | 0.6                            | 60                            | 10                                 | 98.4                     |
| 9          | 0.8                            | 30                            | 15                                 | 99.5                     |
| 10         | 0.4                            | 60                            | 10                                 | 98.9                     |
| 11         | 0.4                            | 30                            | 5                                  | 99.9                     |
| 12         | 0.4                            | 30                            | 15                                 | 99.8                     |
| 13         | 0.8                            | 30                            | 5                                  | 99.5                     |
| 14         | 0.8                            | 90                            | 15                                 | 97.2                     |
| 15         | 0.6                            | 60                            | 15                                 | 98.2                     |
| 16         | 0.6                            | 60                            | 5                                  | 98.7                     |
| 17         | 0.8                            | 60                            | 10                                 | 97.9                     |

**Table S6.** ANOVA analysis of MB rejection according to the second-order model.

| <b>Source</b>          | <b>Sum of Squares</b> | <b>df</b> | <b>Mean Square</b> | <b>F-value</b> | <b>p-value</b> |
|------------------------|-----------------------|-----------|--------------------|----------------|----------------|
| <b>Model</b>           | 9.98                  | 9         | 1.11               | 66.32          | < 0.0001       |
| <b>A-Flow rate</b>     | 1.30                  | 1         | 1.30               | 77.48          | < 0.0001       |
| <b>B-Temperature</b>   | 7.40                  | 1         | 7.40               | 442.18         | < 0.0001       |
| <b>C-Concentration</b> | 0.2250                | 1         | 0.2250             | 13.45          | 0.0080         |
| <b>AB</b>              | 0.1800                | 1         | 0.1800             | 10.76          | 0.0135         |
| <b>AC</b>              | 0.0050                | 1         | 0.0050             | 0.2989         | 0.6015         |
| <b>BC</b>              | 0.0800                | 1         | 0.0800             | 4.78           | 0.0650         |
| <b>A<sup>2</sup></b>   | 0.0048                | 1         | 0.0048             | 0.2860         | 0.6094         |
| <b>B<sup>2</sup></b>   | 0.5614                | 1         | 0.5614             | 33.56          | 0.0007         |
| <b>C<sup>2</sup></b>   | 0.0002                | 1         | 0.0002             | 0.0096         | 0.9246         |
| <b>Lack of Fit</b>     | 0.1104                | 5         | 0.0221             | 6.63           | 0.1363         |
| <b>Error</b>           | 0.0067                | 2         | 0.0033             | 0.0067         | 2              |

**Table S7.** Results of oil rejection.

| <b>Run</b> | <b>A:Flow Rate<br/>(L/min)</b> | <b>B:Temperature<br/>(°C)</b> | <b>C:Concentration<br/>(mg/L)</b> | <b>Rejection<br/>(%)</b> |
|------------|--------------------------------|-------------------------------|-----------------------------------|--------------------------|
| 1          | 0.8                            | 90                            | 3                                 | 97.9                     |
| 2          | 0.6                            | 60                            | 2                                 | 98.4                     |
| 3          | 0.6                            | 60                            | 3                                 | 98.2                     |
| 4          | 0.6                            | 30                            | 2                                 | 98.9                     |
| 5          | 0.4                            | 30                            | 3                                 | 99.1                     |
| 6          | 0.4                            | 90                            | 3                                 | 98                       |
| 7          | 0.4                            | 60                            | 2                                 | 98.7                     |
| 8          | 0.6                            | 60                            | 1                                 | 99.2                     |
| 9          | 0.8                            | 90                            | 1                                 | 98.9                     |
| 10         | 0.6                            | 60                            | 2                                 | 98.5                     |
| 11         | 0.8                            | 30                            | 3                                 | 98.9                     |
| 12         | 0.4                            | 90                            | 1                                 | 99.4                     |
| 13         | 0.8                            | 30                            | 1                                 | 99.4                     |
| 14         | 0.8                            | 60                            | 2                                 | 98                       |
| 15         | 0.6                            | 60                            | 2                                 | 98.4                     |
| 16         | 0.4                            | 30                            | 1                                 | 99.95                    |
| 17         | 0.6                            | 90                            | 2                                 | 98.1                     |

**Table S8.** ANOVA analysis of oil rejection according to the second-order model.

| <b>Source</b>          | <b>Sum of Squares</b> | <b>df</b> | <b>Mean Square</b> | <b>F-value</b> | <b>p-value</b> |
|------------------------|-----------------------|-----------|--------------------|----------------|----------------|
| <b>Model</b>           | 5.44                  | 9         | 0.6043             | 50.30          | < 0.0001       |
| <b>A-Flow rate</b>     | 0.4202                | 1         | 0.4202             | 34.98          | 0.0006         |
| <b>B-Temperature</b>   | 1.56                  | 1         | 1.56               | 129.88         | < 0.0001       |
| <b>C-Concentration</b> | 2.26                  | 1         | 2.26               | 187.82         | < 0.0001       |
| <b>AB</b>              | 0.0028                | 1         | 0.0028             | 0.2341         | 0.6433         |
| <b>AC</b>              | 0.0703                | 1         | 0.0703             | 5.85           | 0.0461         |
| <b>BC</b>              | 0.1378                | 1         | 0.1378             | 11.47          | 0.0116         |
| <b>A<sup>2</sup></b>   | 0.0010                | 1         | 0.0010             | 0.0836         | 0.7808         |
| <b>B<sup>2</sup></b>   | 0.0769                | 1         | 0.0769             | 6.40           | 0.0393         |
| <b>C<sup>2</sup></b>   | 0.3655                | 1         | 0.3655             | 30.43          | 0.0009         |
| <b>Lack of Fit</b>     | 0.0774                | 5         | 0.0155             | 4.65           | 0.1866         |
| <b>Error</b>           | 0.0067                | 2         | 0.0033             |                | 0.0067         |

**Table S9.** Results of LAS rejection.

| <b>Run</b> | <b>A:Flow rate</b> | <b>B:Temperature</b> | <b>C:Concentration</b> | <b>Rejection</b> |
|------------|--------------------|----------------------|------------------------|------------------|
|------------|--------------------|----------------------|------------------------|------------------|

|    | (L/min) | (°C) | (mg/L) | (%) |
|----|---------|------|--------|-----|
| 1  | 0.4     | 30   | 50     | 92  |
| 2  | 0.8     | 30   | 150    | 69  |
| 3  | 0.4     | 90   | 150    | 73  |
| 4  | 0.8     | 90   | 150    | 61  |
| 5  | 0.6     | 60   | 50     | 71  |
| 6  | 0.4     | 30   | 150    | 83  |
| 7  | 0.6     | 30   | 100    | 71  |
| 8  | 0.8     | 60   | 100    | 64  |
| 9  | 0.6     | 60   | 100    | 66  |
| 10 | 0.4     | 90   | 50     | 79  |
| 11 | 0.6     | 60   | 100    | 64  |
| 12 | 0.8     | 30   | 50     | 75  |
| 13 | 0.6     | 60   | 100    | 65  |
| 14 | 0.6     | 60   | 150    | 64  |
| 15 | 0.8     | 90   | 50     | 64  |
| 16 | 0.4     | 60   | 100    | 80  |
| 17 | 0.6     | 90   | 100    | 60  |

**Table S10.** ANOVA analysis of oil rejection according to the second-order model.

| Source                 | Sum of Squares | df | Mean Square | F-value | p-value  |
|------------------------|----------------|----|-------------|---------|----------|
| <b>Model</b>           | 1226.40        | 9  | 136.27      | 273.74  | <0.0001  |
| <b>A-Flow rate</b>     | 547.60         | 1  | 547.60      | 1100.07 | < 0.0001 |
| <b>B-Temperature</b>   | 280.90         | 1  | 280.90      | 564.30  | < 0.0001 |
| <b>C-Concentration</b> | 96.10          | 1  | 96.10       | 193.05  | < 0.0001 |
| <b>AB</b>              | 2.00           | 1  | 2.00        | 4.02    | 0.0851   |
| <b>AC</b>              | 4.50           | 1  | 4.50        | 9.04    | 0.0198   |
| <b>BC</b>              | 4.50           | 1  | 4.50        | 9.04    | 0.0198   |
| <b>A<sup>2</sup></b>   | 123.99         | 1  | 123.99      | 249.08  | < 0.0001 |
| <b>B<sup>2</sup></b>   | 0.2457         | 1  | 0.2457      | 0.4935  | 0.5050   |
| <b>C<sup>2</sup></b>   | 14.21          | 1  | 14.21       | 28.54   | 0.0011   |
| <b>Lack of Fit</b>     | 1.48           | 5  | 0.2969      | 0.2969  | 0.8815   |
| <b>Error</b>           | 2.00           | 2  | 1.0000      |         |          |

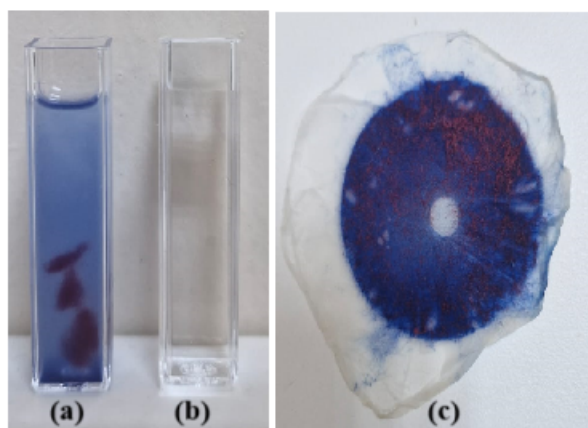

**Figure S5.** Image of synthetic gray water before filtration (a), after filtration and membrane after filtration (c).
